# Supplementary material for: Injectable and self-healing dynamic hydrogel containing bioactive glass nanoparticles as a potential biomaterial for bone regeneration
Source: Royal Society of Chemistry journal article supplement (doi:10.1039/c6ra17327f), 2016-01-01
Supplement: c6ra17327f1.pdf [file c6ra17327f1.pdf]

## Supporting Information

Table S1. Summary of the stress and strain achieved at the material fractures.

|                                 | Stress (MPa) | Strain (%) | Average stress (MPa) |
|---------------------------------|--------------|------------|----------------------|
| Au-(PEGSH) <sub>4</sub> a       | -            | -          | No fracture          |
| Au-(PEGSH) <sub>4</sub> b       | -            | -          |                      |
| Au-(PEGSH) <sub>4</sub> c       | -            | -          |                      |
| Au-(PEGSH) <sub>4</sub> -BAG5a  | 0.038        | 46.7       | 0,039                |
| Au-(PEGSH) <sub>4</sub> -BAG5b  | 0.040        | 50.5       |                      |
| Au-(PEGSH) <sub>4</sub> -BAG5c  | 0.039        | 49.7       |                      |
| Au-(PEGSH) <sub>4</sub> -BAG10a | 0.105        | 62.7       | 0,103                |
| Au-(PEGSH) <sub>4</sub> -BAG10b | 0.113        | 65.1       |                      |
| Au-(PEGSH) <sub>4</sub> -BAG10c | 0.091        | 65.9       |                      |
| Au-(PEGSH) <sub>4</sub> -BAG20a | 0.192        | 72.8       | 0,16                 |
| Au-(PEGSH) <sub>4</sub> -BAG20b | 0.128        | 71.7       |                      |
| Au-(PEGSH) <sub>4</sub> -BAG20c | 0.154        | 71.2       |                      |

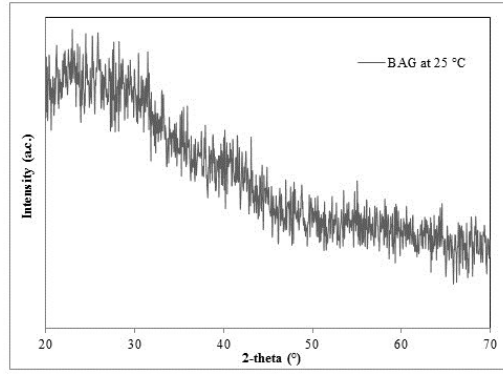

**Fig. S1** XRD spectra of BAG particles with composition 70 n/n % SiO<sub>2</sub> and 30 n/n % CaO.

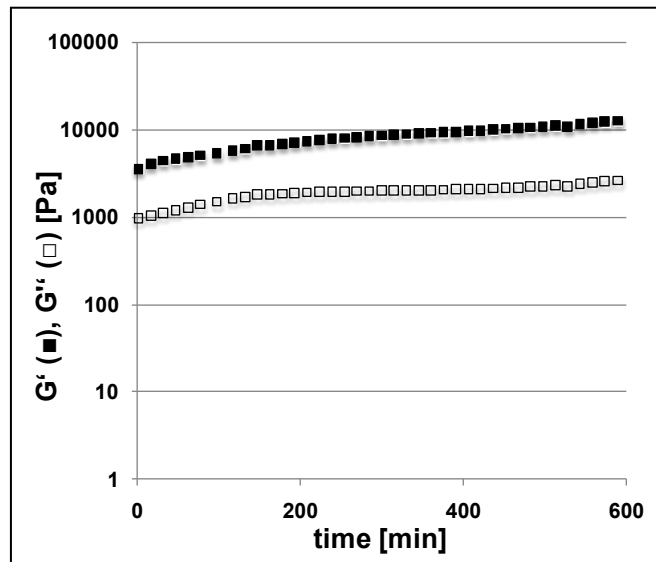

**Fig. S2** Determination of the gelation time by recording variation of  $G'$  (■) and  $G''$  (□) at 1 % deformation and 0.1 Hz in function of time for Au-(PEGSH)<sub>4</sub>-BAG10 hydrogel nanocomposite directly injected on the rheometer plate. Note that  $G' > G''$  from the start of the experiment. This indicates that the gel is already formed and the gelation occurred quasi instantaneously.

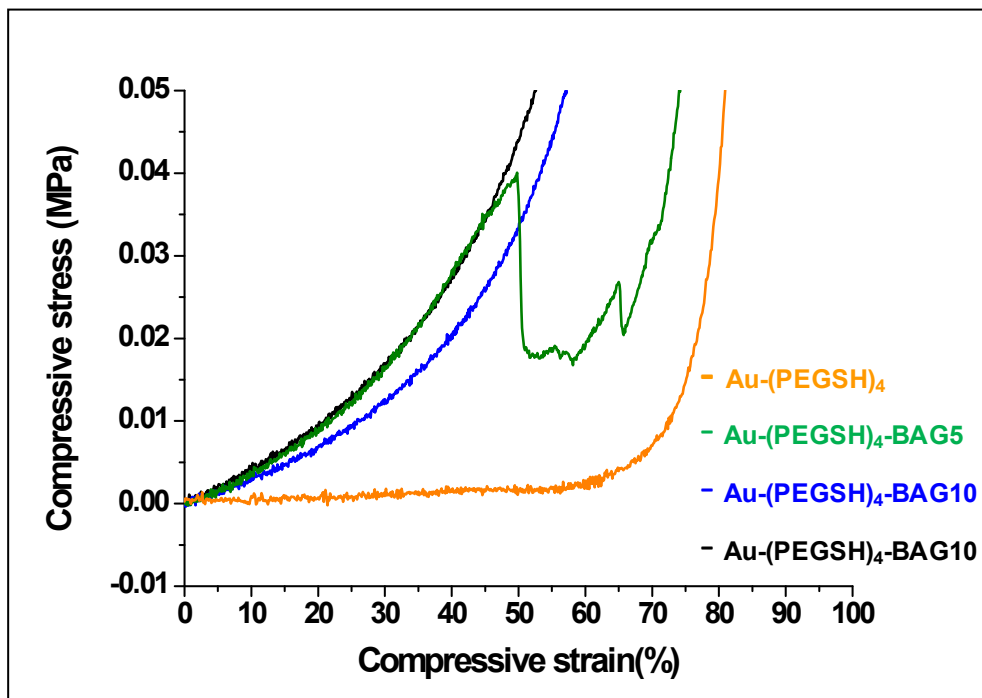

Fig. S3 Compression vs deformation curves for all hydrogel nanocomposites at low compressive stress.

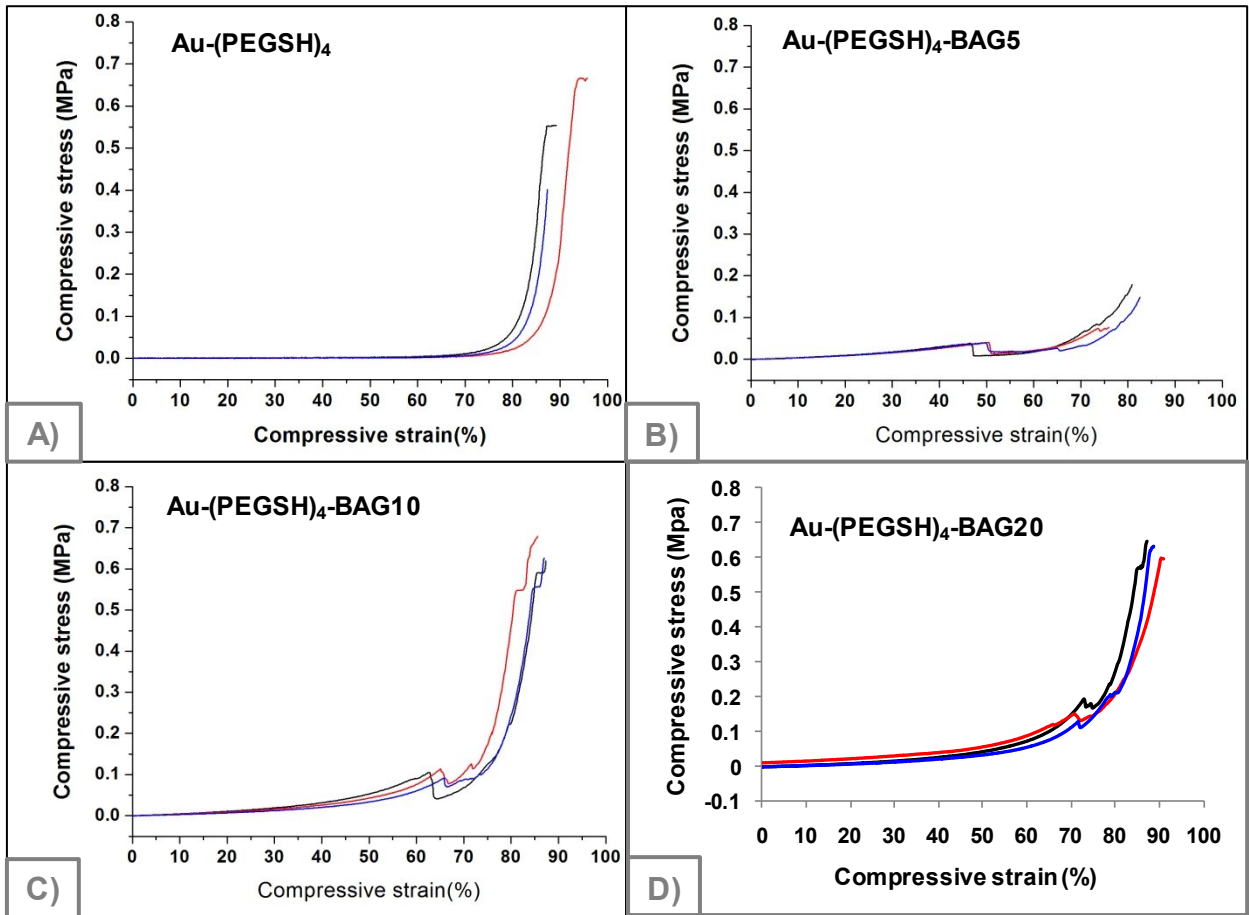

Fig. S4 Reproducibility of the compression vs deformation curves for all hydrogel nanocomposites prepared 3 times.

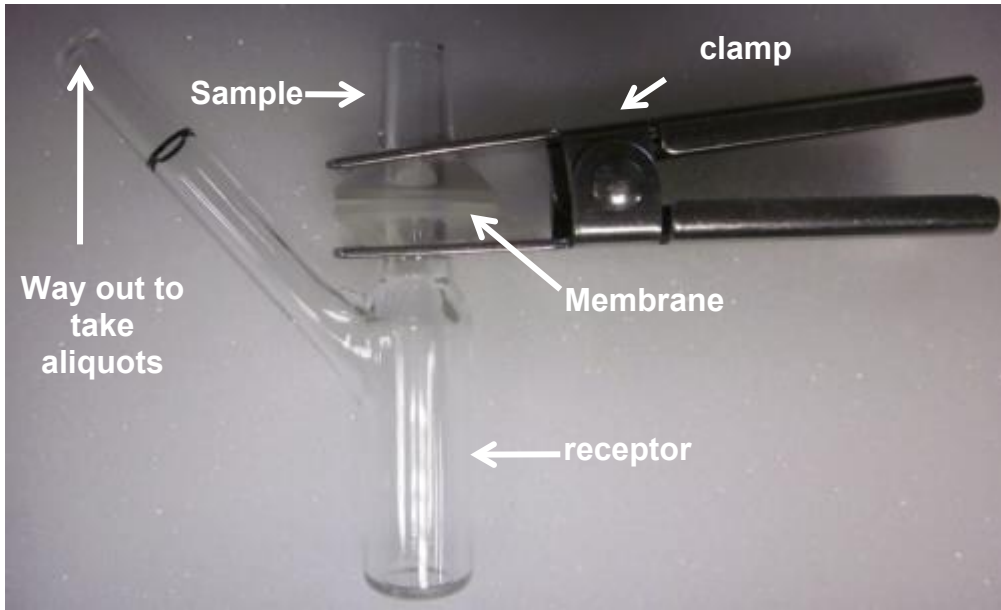

Fig. S5 Digital pictures of the Franz cell diffusion chamber.

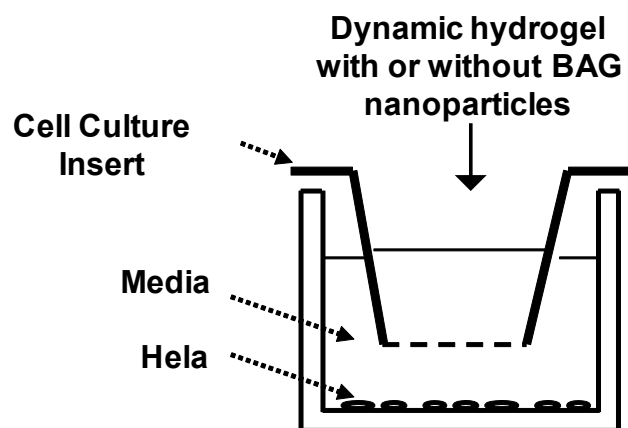

**Fig. S6** Schematic representation of the cell culture insert used to evaluate the cytotoxicity of the product release by BAG nanoparticle, Au-(PEGSH)<sub>4</sub> dynamic hydrogel and Au-(PEGSH)<sub>4</sub>-BAG10 hydrogel nanoacomposite.

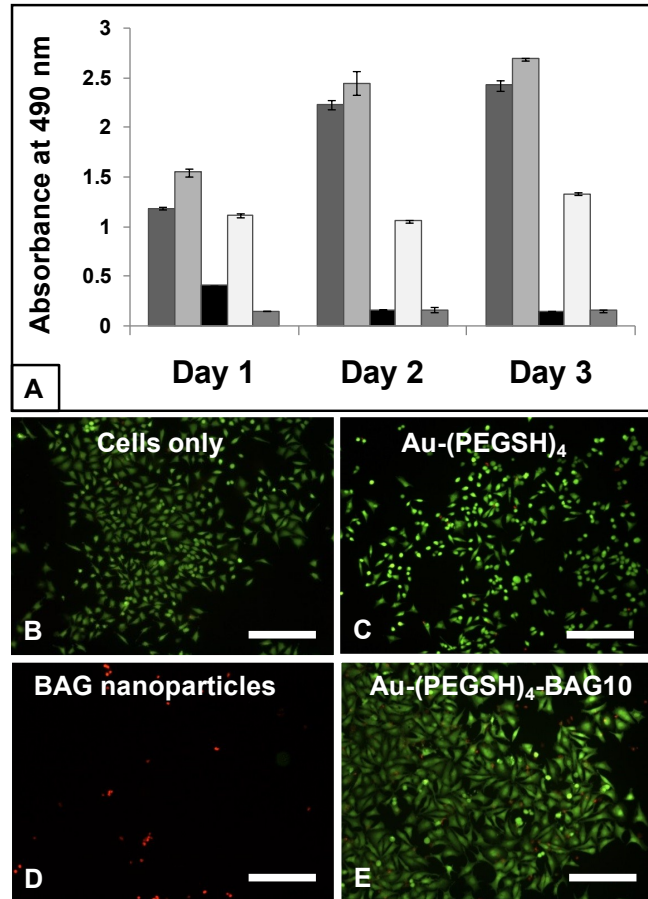

**Fig. S7** (A) MTS assay at day 1, 2 and 3 for cells only (positive control experiment, dark grey), Au-(PEGSH)<sub>4</sub> dynamic hydrogel (light grey), BAG nanoparticles alone (black), Au-(PEGSH)<sub>4</sub>-BAG10 (white) and triton X (surfactant as negative control, medium grey). The order of sample description is the same as the order of the representative bars. LIVE/DEAD assay after 3 days with healthy cells in green and dead cell in red for (B) cells only, (C) Au-(PEGSH)<sub>4</sub> dynamic hydrogel, (D) BAG nanoparticles alone, and (E) Au-(PEGSH)<sub>4</sub>-BAG10 hydrogel nanocomposite (scale bar 200 μm).



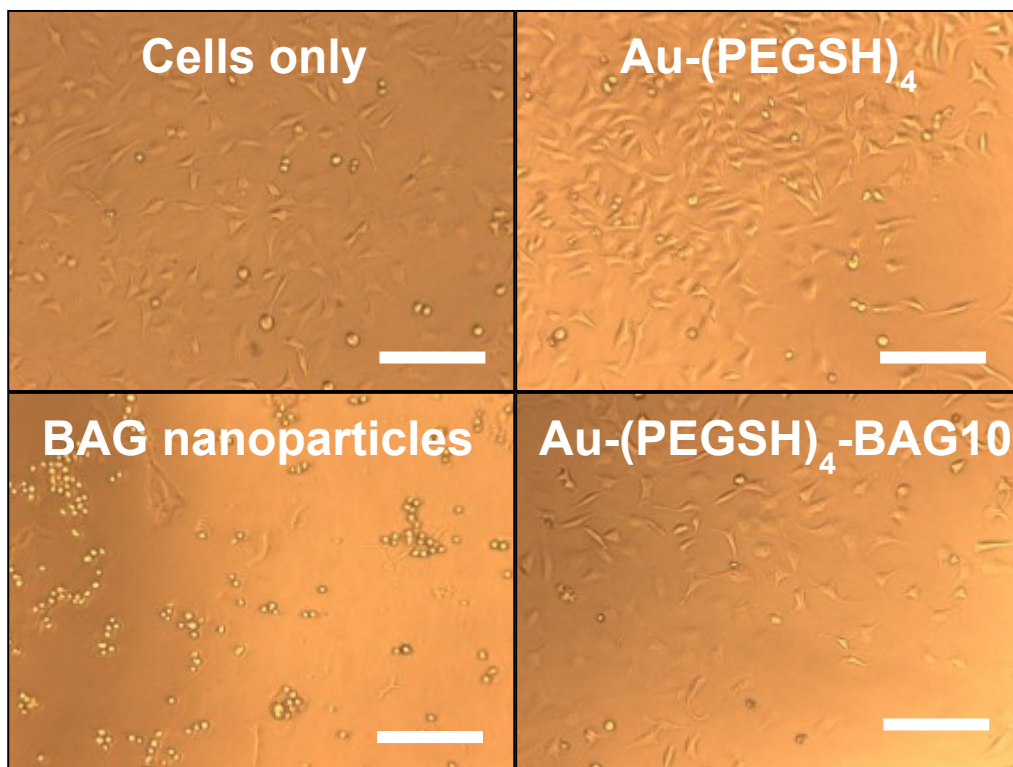

**Fig. S8** Optical microscope pictures of HeLa cells after one day alone or in the presence of Au-(PEGSH)<sub>4</sub> dynamic hydrogel, BAG nanoparticles and Au-(PEGSH)<sub>4</sub>-BAG10 hydrogel nanocomposites placed in an insert.

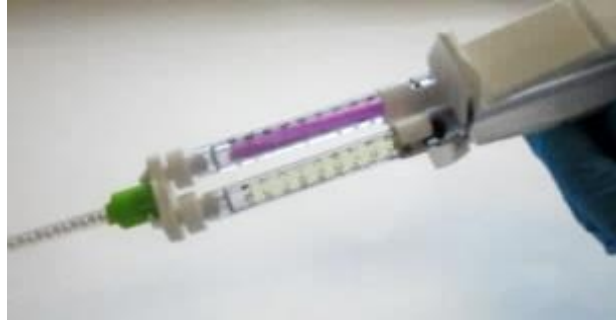

**Fig. S9** Possible double syringe application of the Au-(PEG)<sub>4</sub>-BAG10 nanocomposite hydrogel.
